# Supplementary material for: Regulating the electron spin orbital by sulfur doping of Ti vacancies to manipulate spin flip for enhancing PEC water splitting performance
Source: Royal Society of Chemistry journal article supplement (doi:10.1039/d4ee02674h), 2024-01-01
Supplement: d4ee02674h1.pdf [file d4ee02674h1.pdf]

## Regulating electron spin orbital by sulfur atoms-doped Ti vacancies to manipulate spin flip for enhancing PEC water splitting

Yixuan Gao ‡<sup>a,b</sup>, Min Zhang ‡<sup>a</sup>, Qi Zhao ‡<sup>a</sup>, Wen Liu ‡<sup>b</sup>, Lirong Zheng <sup>c</sup>, Jin Ouyang <sup>d</sup> and Na Na <sup>\*a</sup>

---

a. *Key Laboratory of Radiopharmaceuticals, Ministry of Education, College of Chemistry, Beijing Normal University, Beijing, 100875, P.R. China, E-mail: nana@bnu.edu.cn*

b. *The Key Laboratory of Water and Sediment Sciences, Ministry of Education, College of Environmental Sciences and Engineering, Peking University, Beijing, 100871, P.R. China*

c. *Beijing Synchrotron Radiation Facility Institute of High Energy Physics Chinese Academy of Sciences, Beijing, 100049, P.R. China*

d. *Department of Chemistry, College of Arts and Sciences, Beijing Normal University at Zhuhai, Zhuhai, 519087, P.R. China*

‡ *These authors contributed equally to this work.*

## Table of content

|                                                                       |    |
|-----------------------------------------------------------------------|----|
| Section 1. Chemicals and Instrumentation.....                         | 3  |
| 1.1 Chemicals.....                                                    | 3  |
| 1.2 Instrumentation .....                                             | 3  |
| Section 2. Experimental methods.....                                  | 5  |
| 2.1 Synthesis of TiO <sub>2</sub> nanorods on FTO substrate.....      | 5  |
| 2.2 Synthesis of Tiv-TiO <sub>2</sub> nanorods.....                   | 5  |
| 2.3 Synthesis of S-Tiv-TiO <sub>2</sub> nanorods .....                | 5  |
| 2.4 Synthesis of H <sub>2</sub> S-Tiv-TiO <sub>2</sub> nanorods ..... | 5  |
| 2.5 Synthesis of CS <sub>2</sub> -Tiv-TiO <sub>2</sub> nanorods ..... | 5  |
| Section 3. Detailed calculation procedures .....                      | 6  |
| 3.1 carrier densities ( $N_d$ ).....                                  | 6  |
| 3.2 The incident photon-to-current conversion efficiency (IPCE).....  | 6  |
| 3.3 The absorbed photon-to-current efficiency (APCE) .....            | 6  |
| 3.4 The applied bias photon-to-current efficiency (ABPE) .....        | 7  |
| 3.5 Tauc plot equation.....                                           | 7  |
| Section 4. XAFS measurement and data analysis.....                    | 8  |
| Section 5. Electrochemical measurements.....                          | 9  |
| Section 6. Computational methods and models .....                     | 10 |
| Section 7. Supplementary Figures and Tables .....                     | 11 |

## **Section 1. Chemicals and Instrumentation**

### **1.1 Chemicals**

All chemicals were purchased from commercial sources and used without further purification. Tetrabutyl titanate was purchased from Macklin. Concentrated hydrochloric acid (HCl) was provided by Beijing Tongguang Fine Chemical Co., LTD. Sulfur powder was purchased from Aladdin. Thioacetamide ( $\text{CH}_3\text{CSNH}_2$ ) was provided by Innochem. Carbon disulfide ( $\text{CS}_2$ ) was purchased from Xiya Chemical Technology (Shandong) Co., LTD. High-purity water ( $18.2 \text{ M}\Omega\cdot\text{cm}$ ) supplied by Mill-Q Purification System. Fluorine-doped tin oxide (FTO) substrates ( $\text{SnO}_2$ : F,  $15 \Omega\cdot\text{cm}^{-2}$ ) were purchased from Wuhan Geao Instruments. Pretreatment was required before use. The FTO substrate was immersed in a solution of  $\text{H}_2\text{O}$ -ethanol-acetone mixed in equal proportions for ultrasonic cleaning for 20 min. Then cleaned with deionized (DI) water and dried in an oven at  $40 \text{ }^\circ\text{C}$  for 15 min.

### **1.2 Instrumentation**

The field emission scanning electron microscope (FESEM) (Model SU-8010, Japan) was adopted for imaging. The high-resolution transmission electron microscopy (HRTEM) of FEI Talos 200s TEM was applied for characterizations at an operating voltage of 200 kV. High-angle annular dark field scanning transmission electron microscopy (HAADF-STEM) measurements were taken on a transmission electron microscopy with a probe corrector (FEI Theims Z, Titan Cubed Themis G2300, JEM-ARM200F). Positron annihilation (PAL) of the samples were analyzed on a DPLS3000. X-ray diffraction measurement was characterized by Maxima XRD-7000 (Shimadzu, Japan). XPS spectra were recorded by using an X-ray spectrometer (Thermo ESCALAB 250 XI, PHI-5000 versaprobe III, Thermo Kalpha) with Al  $K\alpha$  excitation source. Raman spectra were recorded by Renishaw RM-1000 Raman spectrometer at room temperature, with 532 nm laser as excitation light source. The production of oxygen was detected by gas chromatography (GC, 2014C, Ar carrier, Shimadzu).

XAFS spectra at the Ti (4966 eV) K-edge were measured at the 1W1B beamline of the Beijing Synchrotron Radiation Facility (BSRF) and BL14W1 beamline of the Shanghai Synchrotron Radiation Facility (SSRF), respectively. The XANES spectra at the Ti L-edge and O K-edge were measured at National Synchrotron Radiation Laboratory (NSRL) in Hefei. The incident photon-to-current conversion efficiency (IPCE) was measured using a monochromator with a 300 W Xe light source (CEL-QPCE3000).

## **Section 2. Experimental methods**

### **2.1 Synthesis of TiO<sub>2</sub> nanorods on FTO substrate**

TiO<sub>2</sub> nanorods were grown on the conductive surface of FTO substrate by classical hydrothermal method. Add 6 mL concentrated HCl, 6 mL DI water and 200 μL tetrabutyl titanate into a 25 mL of Teflon-lined stainless steel autoclave and stir for 10 min to ensure uniformity. A treated piece of 1 cm×4.5 cm FTO was inserted diagonally into the Teflon-lined stainless steel autoclave with the conductive side down and heated at 170 °C for 10 h. After cooling to room temperature, the obtained white film on the FTO substrate was washed with DI water and dried in an 40 °C oven.

### **2.2 Synthesis of Tiv-TiO<sub>2</sub> nanorods**

The synthesized FTO coated with TiO<sub>2</sub> film was placed in a tubular furnace at 450 °C for 2 h. The inner cavity of a tubular furnace is in an air atmosphere.

### **2.3 Synthesis of S-Tiv-TiO<sub>2</sub> nanorods**

The doping of S element was carried out in a tubular furnace in high-purity N<sub>2</sub> (99.999%). Specifically, a piece of FTO coated with Tiv-TiO<sub>2</sub> was placed onto a ceramic boat, and 15 mg sulfur powder was evenly dispersed on another ceramic boat, where the ceramic boat containing sulfur powder was placed upstream of the stream. The temperature of the tubular furnace was increased from room temperature to 250 °C at a rate of 3 °C/min and keep 2 h for the doping progress.

### **2.4 Synthesis of H<sub>2</sub>S-Tiv-TiO<sub>2</sub> nanorods**

H<sub>2</sub>S-Tiv-TiO<sub>2</sub> was synthesized following the same procedure as S-Tiv-TiO<sub>2</sub>, except for the addition of 50 mg thioacetamide and 1 mL DI water instead of 15 mg sulfur powder.

### **2.5 Synthesis of CS<sub>2</sub>-Tiv-TiO<sub>2</sub> nanorods**

The Tiv-TiO<sub>2</sub> and CS<sub>2</sub> were placed in a 25 mL Teflon-lined stainless steel autoclave and heated at 120 °C for 2 h.

### Section 3. Detailed calculation procedures

#### 3.1 carrier densities ( $N_d$ )

The charge carrier concentration ( $N_d$ ) is obtained through the Mott-Schottky equation:

$$\frac{1}{C^2} = \frac{2}{q\epsilon\epsilon_0 N_d} \left( V - V_{FB} - \frac{kT}{Q} \right)$$

Where  $C$  is the capacitance per unit area,  $q$  is the elementary charge,  $\epsilon$  is the dielectric constant of  $\text{TiO}_2$ ,  $\epsilon_0$  is the permittivity of vacuum,  $N_d$  is the charge carrier density,  $V$  is the electrode applied potential,  $k$  is the Boltzmann constant, and  $T$  is the absolute temperature. The  $N_d$  can be calculated as:

$$N_d = \frac{2}{q\epsilon\epsilon_0} \left[ \frac{d \left( \frac{1}{C^2} \right)}{d} \right]^{-1}$$

#### 3.2 The incident photon-to-current conversion efficiency (IPCE)

$$IPCE = \frac{1240 J_{photo}}{\lambda P}$$

Where  $J_{photo}$  is the measured photocurrent density,  $\lambda$  is the wavelength,  $P$  is the measured irradiance under monochromatic light.

#### 3.3 The absorbed photon-to-current efficiency (APCE)

$$APCE = \frac{IPCE}{LHE}$$

The light harvesting efficiency (LHE, defined as the ratio of absorbed light to the incident light) of each photoanode is calculated from the UV-vis absorption spectra:

$$LHE = 1 - 10^{-A(\lambda)}$$

Where  $A(\lambda)$  is the absorbance at wavelength  $\lambda$ .

### 3.4 The applied bias photon-to-current efficiency (ABPE)

$$ABPE = \frac{J_{photo}(1.23 - V_{app})}{P_{light}}$$

Where  $J_{photo}$  is the photocurrent density,  $V_{app}$  is the applied bias (V vs. RHE),  $P_{light}$  is the incident light density ( $100 \text{ mW} \cdot \text{cm}^{-2}$ ).

### 3.5 Tauc plot equation

The bandgaps of the catalysts are confirmed via the equation:

$$(\alpha h\nu)^{1/n} = A(h\nu - E_g)$$

Where  $\alpha$  is absorption coefficient,  $\nu$  light frequency,  $E_g$  is bandgap and  $A$  is a constant,  $n$  is 1/2 for direct bandgap semiconductor and 2 for the indirect bandgap semiconductor (rutile  $\text{TiO}_2$  is direct bandgap semiconductor). The intercept of the extrapolated linear fit to the experimental data of a plot of  $(\alpha h\nu)^{1/n} - h\nu$  is the forbidden band width value ( $E_g$ ).

Mott-Schottky plots were collected at 10 mV amplitude with a frequency of 500, 1000 and 2000 Hz. The flat band potential of  $\text{TiO}_2$ , S-Tiv- $\text{TiO}_2$ ,  $\text{H}_2\text{S}$ -Tiv- $\text{TiO}_2$  and  $\text{CS}_2$ -Tiv- $\text{TiO}_2$  are about -1.06, -1.15, -1.18 and -1.20 V vs. NHE, respectively. The flat band potential is  $\sim 0.10$  V below the bottom of the conduction band for n-type semiconductors. The CB of  $\text{TiO}_2$ , S-Tiv- $\text{TiO}_2$ ,  $\text{H}_2\text{S}$ -Tiv- $\text{TiO}_2$  and  $\text{CS}_2$ -Tiv- $\text{TiO}_2$  are determined as -0.96, -1.05, -1.08 and -1.10 V vs. NHE, respectively.

#### Section 4. XAFS measurement and data analysis

The EXAFS spectra were obtained by subtracting the post-edge background from the overall absorption and then normalizing with respect to the edge-jump step. And then, the  $\chi(k)$  data was Fourier transformed to real R-space to separate the EXAFS contributions from different coordination shells. In order to confirm the quantitative structural parameters around central atoms, least-squares curve parameter fitting was performed using the Artemis module. The following EXAFS equation was used for the calculation of the theoretical scattering amplitudes, phase shifts and the photoelectron mean free paths.

$$X(k) = \sum_j \frac{N_j S_0^2 F_j(k)}{k R_j^2} \exp[-2k^2 \sigma_j^2] \exp\left[\frac{-2R_j}{\lambda(k)}\right] \sin[2kR_j + \Phi_j(k)]$$

$R_j$  is the distance between the X-ray absorbing central atom and the atoms in the  $j^{\text{th}}$  atomic shell,  $N_j$  is the number of neighbors in the  $j^{\text{th}}$  atomic shell,  $S_0^2$  is the amplitude reduction factor,  $F_j(k)$  is the effective curved-wave backscattering amplitude,  $\lambda$  is the mean free path in Å,  $\phi_j(k)$  is the phase shift (including the phase shift for each shell and the total central atom phase shift),  $\sigma_j$  is the Debye-Waller parameter of the  $j^{\text{th}}$  atomic shell (variation of distances around the average  $R_j$ ). All fits were performed in the  $R$  space with  $k^2$ -weight for Ti K-edge.



## Section 5. Electrochemical measurements

The PEC measurements were performed by electrochemical workstation (CH Instruments 660D). A 350 W xenon lamp (controlled by an external potentiostat) provided simulated solar light ( $100 \text{ mW} \cdot \text{cm}^{-2}$ ) for the PEC tests. The electrolyte was 1 M NaOH (pH 14). Mott-Schottky plots of photocatalysts were carried out in  $\text{N}_2$  purged 0.5 mol/L  $\text{Na}_2\text{SO}_4$  electrolyte solutions. A typical three-electrode configuration was used with the catalysts ( $\text{TiO}_2$ , S-Tiv- $\text{TiO}_2$ ,  $\text{H}_2\text{S}$ -Tiv- $\text{TiO}_2$  and  $\text{CS}_2$ -Tiv- $\text{TiO}_2$ ) as the working electrode, a saturated Hg/HgCl<sub>2</sub> electrode as the reference electrode and a Pt foil ( $1 \times 1 \text{ cm}^2$ ) as the counter electrode. According to the Nernst equation, the measured potentials vs. Hg/HgCl<sub>2</sub> were converted to the reversible hydrogen electrode (RHE) scale:

$$E_{RHE} = E_{\text{Hg}/\text{HgCl}_2} + 0.059 \text{ pH} + E_{\text{Hg}/\text{HgCl}_2}^{\theta}$$

Where  $E_{\text{Hg}/\text{HgCl}_2}^{\theta} = 0.24 \text{ V}$  at  $25 \text{ }^{\circ}\text{C}$ ,  $E_{RHE}$  is the converted potential vs. RHE,  $E_{\text{Hg}/\text{HgCl}_2}$  is the experimentally measured potential against the Hg/HgCl<sub>2</sub> reference.

## Section 6. Computational methods and models

The density functional theory (DFT) calculations were performed using the Vienna ab initio Simulations Package (VASP, version 6.3.0). All geometry optimizations and self-consistent total-energy calculations were performed with the projector-augmented wave (PAW) method at the Perdew-Burke-Ernzerhof (PBE) densities functional level. The cut-off energy of 450 eV for plane-wave was set for all calculations while the atomic position was fully relaxed until the convergence criteria of force and energy was less than 0.02 eV/Å and  $10^{-5}$  eV, respectively. The structural optimizations of TiO<sub>2</sub> (110) surface models were optimized with a 3×3×1 gamma-point centered k-point grid for Brillouin zone sampling and the top 3 atomic layers were allowed to fully relax while the bottom atomic 4 layer was fixed. Several defected and doped models were further built based on it. A vacuum slab exceeding 15 Å was employed in z direction so that interaction so that interaction between two neighboring surfaces can be neglected.

The OER performance was explored under the theoretical framework developed by Nørskov *et al.* The associative mechanism and a four-electron pathway were considered, according to which the OER elementary reactions are described as follows:

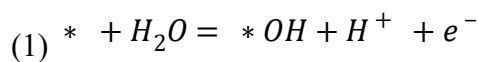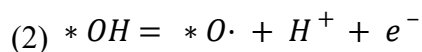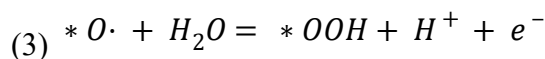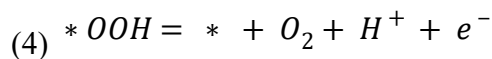

Where \* represents an active site. \*OH, \*O· and \*OOH are the active sites with OH, O· and OOH intermediate adsorption, respectively. The free energy of the intermediates is defined as:

$$\Delta G = \Delta E + \Delta ZPE - T\Delta S$$

Where  $\Delta E$  is the total energy change obtained from DFT calculations.  $\Delta ZPE$  and  $\Delta S$  denote zero-point energy and entropy correction at room temperature (298.15 K), respectively. Since the equilibrium potential for OER is 1.23 V (vs. RHE), the full

energy of the four electrons transfer reaction is  $4 \times 1.23 = 4.92$  eV. Therefore  $\Delta G_4$  was calculated by  $4.92 - \Delta G_1 - \Delta G_2 - \Delta G_3$  to avoid calculating the  $O_2$  adsorption and desorption, which was known that DFT calculation could not accurately describe.

## Section 7. Supplementary Figures and Tables

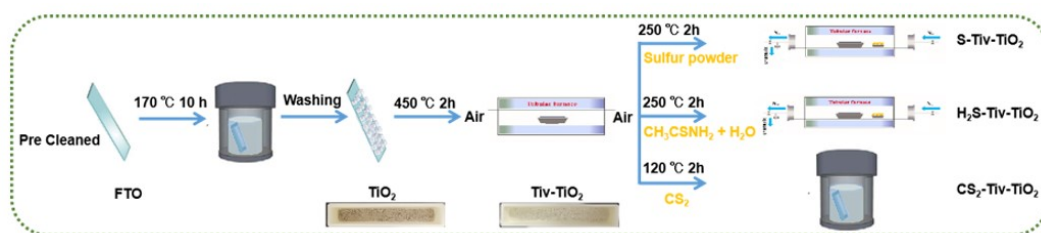

**Fig. S1** Schematic representation of the preparation of sulfur-doped  $TiO_2$  catalysts.

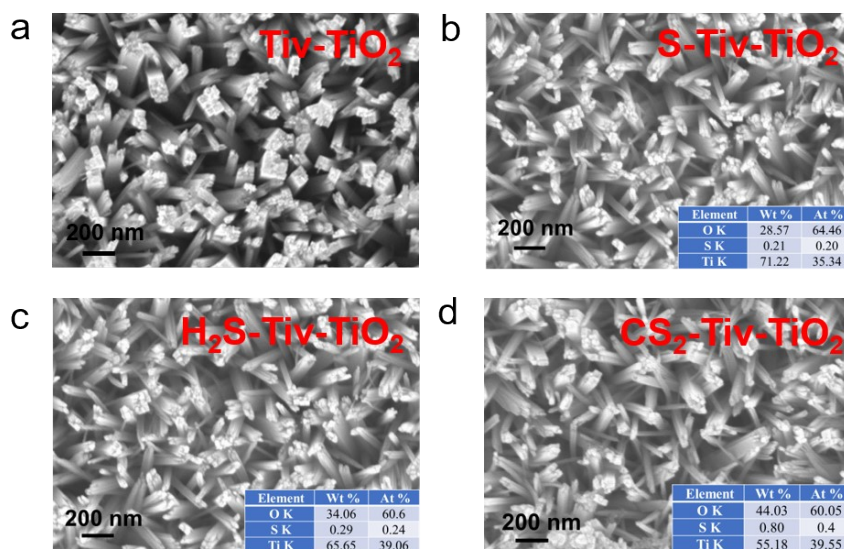

**Fig. S2** SEM images of (a)  $Tiv-TiO_2$ , (b)  $S-Tiv-TiO_2$ , (c)  $H_2S-Tiv-TiO_2$  and (d)  $CS_2-Tiv-TiO_2$ .

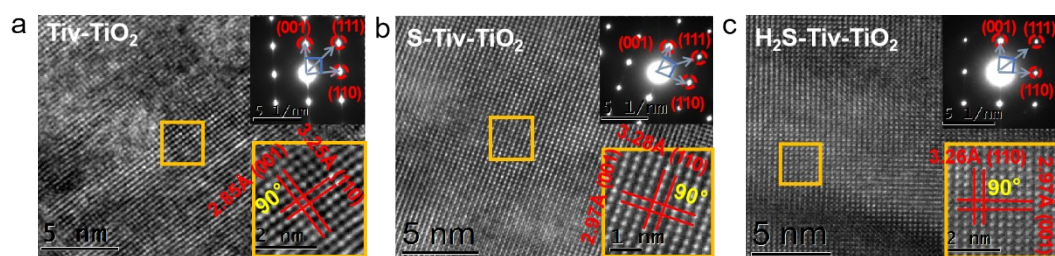

**Fig. S3** HRTEM images of (a) Tiv-TiO<sub>2</sub>, (b) S-Tiv-TiO<sub>2</sub> and (c) H<sub>2</sub>S-Tiv-TiO<sub>2</sub> (inset: an enlarged HRTEM image of the selected area and the corresponding SAED patterns).

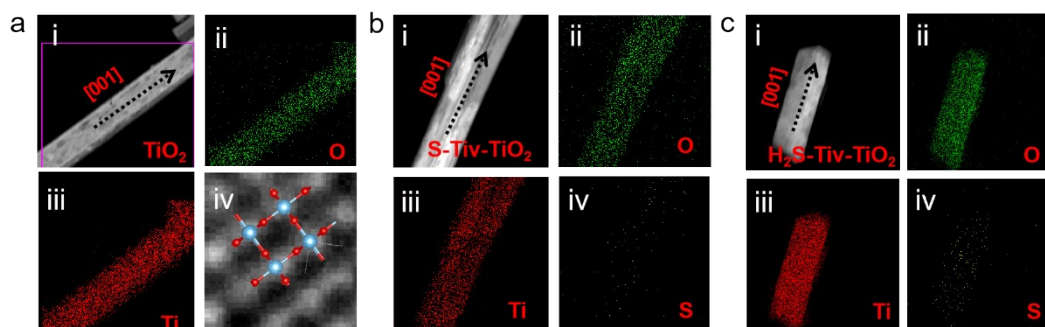

**Fig. S4** EDS elemental mapping profiles of (a) TiO<sub>2</sub> and the enlarged of HRTEM (inset: the structure of TiO<sub>2</sub>), (b) S-Tiv-TiO<sub>2</sub> and (c) H<sub>2</sub>S-Tiv-TiO<sub>2</sub>.

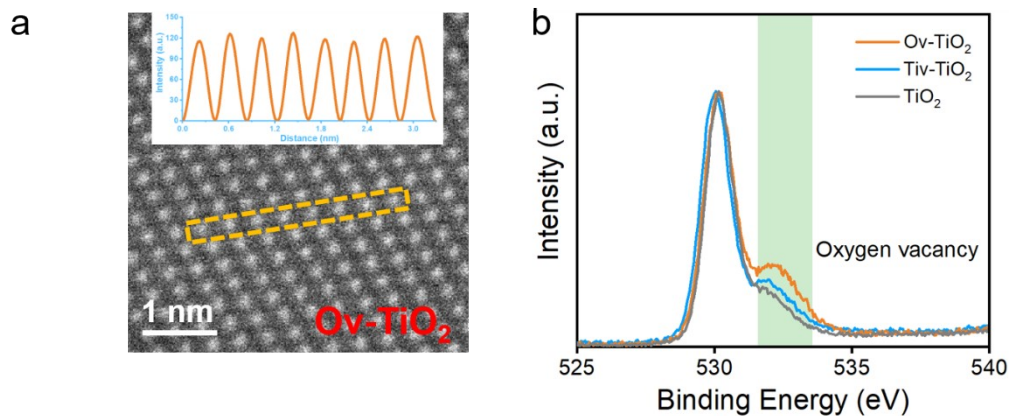

**Fig. S5** (a) HAADF-STEM image of Ov-TiO<sub>2</sub> (inset: the corresponding intensity line profiles of the selected area). (b) XPS spectra of Ov-TiO<sub>2</sub>, Tiv-TiO<sub>2</sub> and TiO<sub>2</sub>.

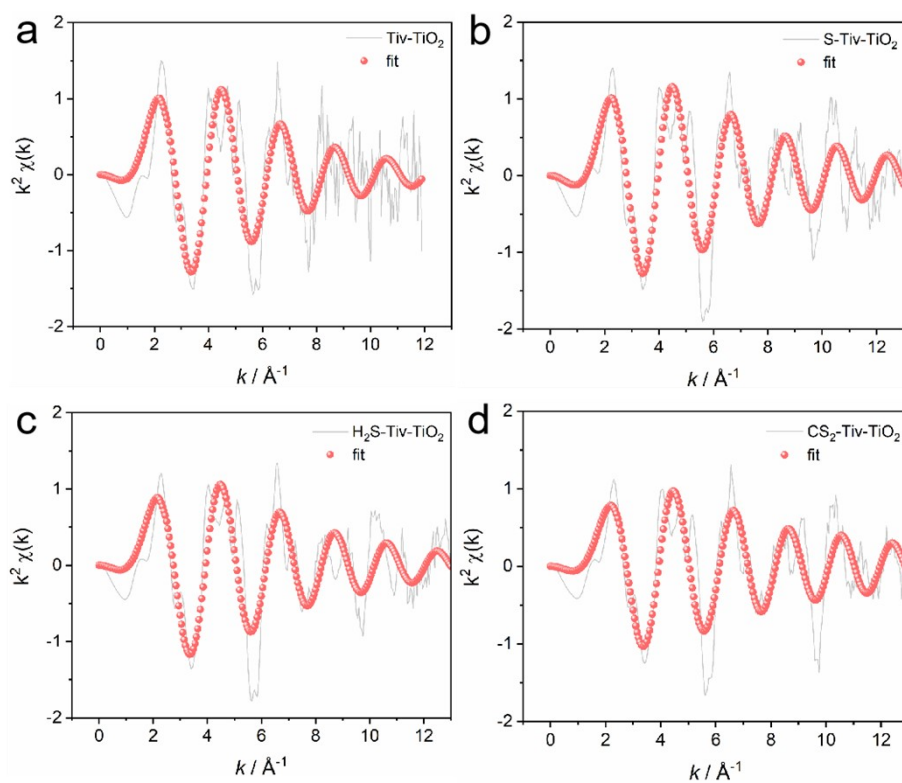

**Fig. S6** Ti *K*-edge FT-EXAFS analysis of (a) Tiv-TiO<sub>2</sub>, (b) S-Tiv-TiO<sub>2</sub>, (c) H<sub>2</sub>S-Tiv-TiO<sub>2</sub> and (d) CS<sub>2</sub>-Tiv-TiO<sub>2</sub> in *k* space.

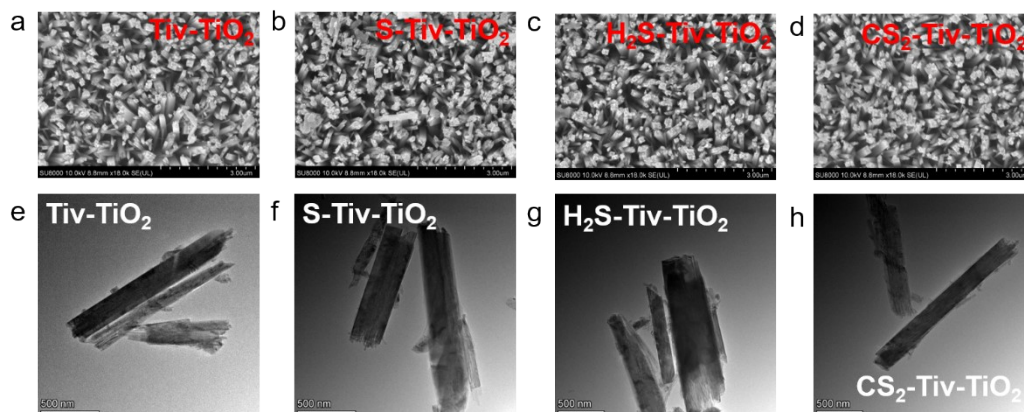

**Fig. S7** SEM images of (a) Tiv-TiO<sub>2</sub>, (b) S-Tiv-TiO<sub>2</sub>, (c) H<sub>2</sub>S-Tiv-TiO<sub>2</sub> and (d) CS<sub>2</sub>-Tiv-TiO<sub>2</sub> after OER test. TEM images of (e) Tiv-TiO<sub>2</sub>, (f) S-Tiv-TiO<sub>2</sub>, (g) H<sub>2</sub>S-Tiv-TiO<sub>2</sub> and (h) CS<sub>2</sub>-Tiv-TiO<sub>2</sub> after OER test.

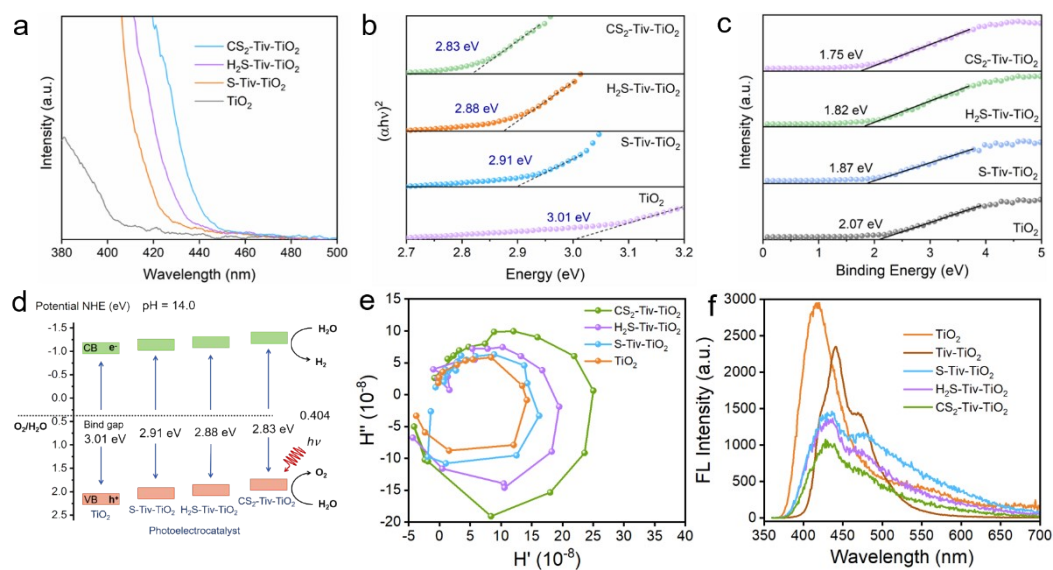

**Fig. S8** (a) UV-vis absorption spectra and (b) Valence band obtained from XPS data for the catalysts. (c) Tauc plot analysis of the optical bandgaps derived from UV-vis spectra. (d) Schematic illustration of the relationship between VB and conduction band (CB), with bandgap marked. (e)



IMPS spectra of  $\text{TiO}_2$ , S-Tiv- $\text{TiO}_2$ ,  $\text{H}_2\text{S-Tiv-TiO}_2$  and  $\text{CS}_2\text{-Tiv-TiO}_2$ . (f) Room-temperature PL emission spectra.

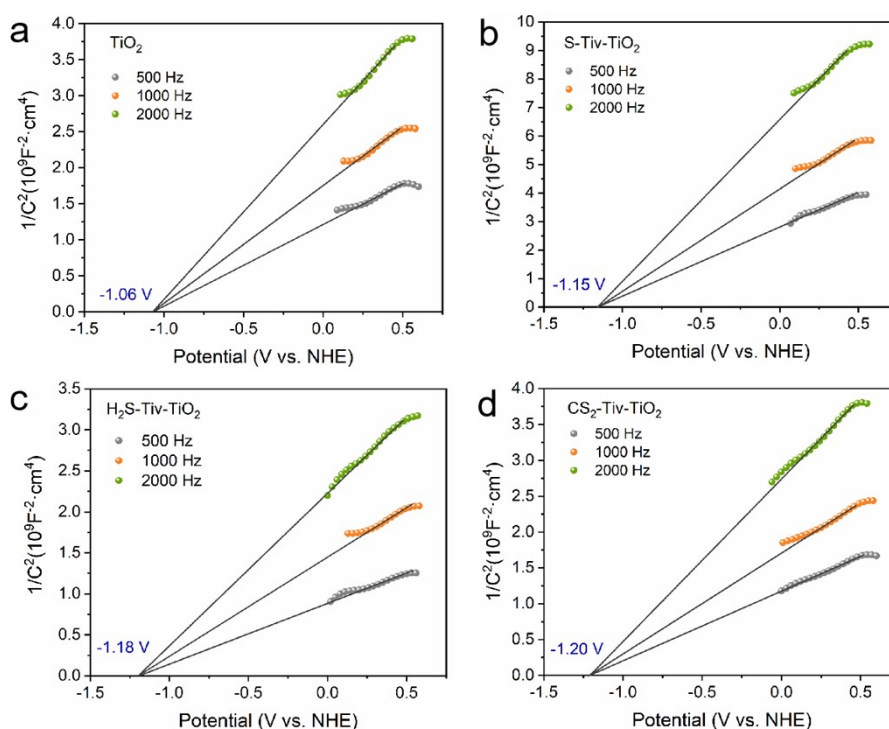

**Fig. S9** Mott-Schottky plots under different frequencies for (a)  $\text{TiO}_2$ , (b) S-Tiv- $\text{TiO}_2$ , (c)  $\text{H}_2\text{S-Tiv-TiO}_2$  and (d)  $\text{CS}_2\text{-Tiv-TiO}_2$ .

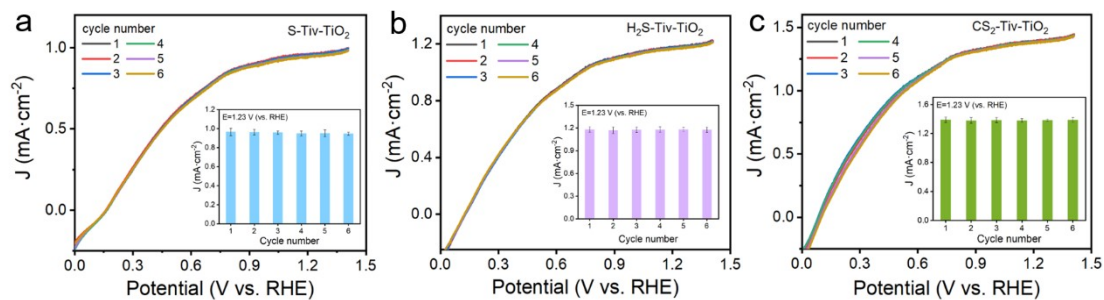

**Fig. S10** Linear sweep voltammetry (LSV) curves of (a) S-Tiv- $\text{TiO}_2$ , (b)  $\text{H}_2\text{S-Tiv-TiO}_2$ , (c)  $\text{CS}_2\text{-Tiv-TiO}_2$  for 6 cycles (inset: the photocurrent values corresponding to 1.23V vs. RHE from LSV curves).

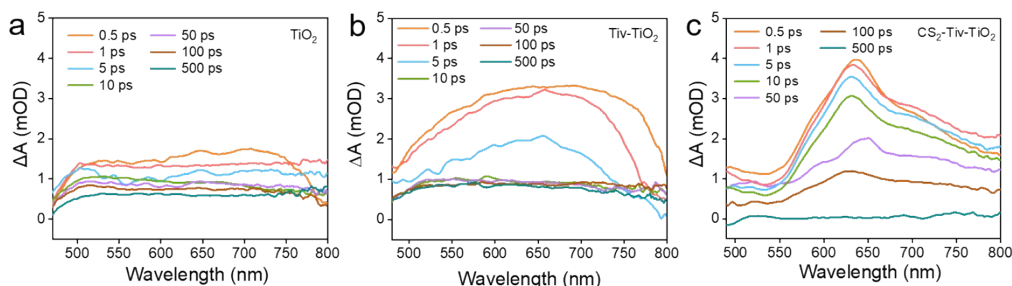

**Fig. S11** The transient absorption spectra of (a)  $\text{TiO}_2$ , (b)  $\text{Tiv-TiO}_2$ , (c)  $\text{CS}_2\text{-Tiv-TiO}_2$  observed in visible light region under 355 nm pump laser excitation.

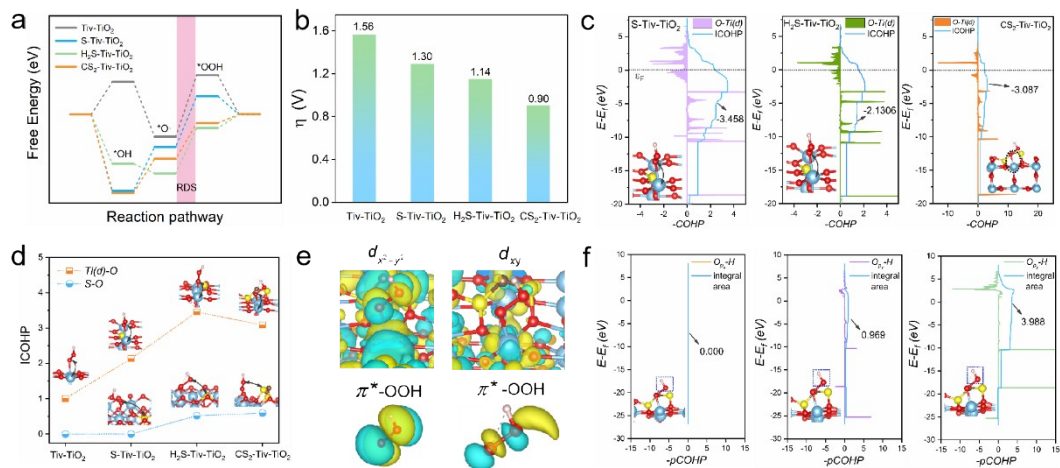

**Fig. S12** (a) Gibbs free energy diagram for the four steps of OER and (b) the theoretical overpotential for  $\text{Tiv-TiO}_2$ ,  $\text{S-Tiv-TiO}_2$ ,  $\text{H}_2\text{S-Tiv-TiO}_2$  and  $\text{CS}_2\text{-Tiv-TiO}_2$ . (c) COHP of the Ti-O pair and corresponding ICOHP of  $\text{S-Tiv-TiO}_2$ ,  $\text{H}_2\text{S-Tiv-TiO}_2$  and  $\text{CS}_2\text{-Tiv-TiO}_2$ , (d) The ICOHP of Ti-O and S-O pair for  $\text{Tiv-TiO}_2$ ,  $\text{S-Tiv-TiO}_2$ ,  $\text{H}_2\text{S-Tiv-TiO}_2$  and  $\text{CS}_2\text{-Tiv-TiO}_2$ . (e) The wave functions between  $d_{x^2-y^2}$  and  $d_{xy}$  orbitals and  $\pi^*$  orbitals are displayed along with their respective



energy levels. (f) Projected COHP of the H 1s and  $p_x, p_y, p_z$  orbitals of O and corresponding ICOHP of CS<sub>2</sub>-Tiv-TiO<sub>2</sub>.

**Table S1.** EXAFS fitting parameters at the Ti *K*-edge various samples.

| Sample                                | CN  | E <sub>0</sub> | ΔR   | σ <sup>2</sup> |
|---------------------------------------|-----|----------------|------|----------------|
| Tiv-TiO <sub>2</sub>                  | 5.4 | -2.8           | 0.01 | 0.001          |
| S-Tiv-TiO <sub>2</sub>                | 5.6 | -1.59          | 0.03 | 0.002          |
| H <sub>2</sub> S-Tiv-TiO <sub>2</sub> | 5.5 | -4.07          | 0.01 | 0.003          |
| CS <sub>2</sub> -Tiv-TiO <sub>2</sub> | 5.6 | -2.8           | 0.01 | 0.001          |

S<sub>0</sub><sup>2</sup> were set as 0.8 for all samples, according to the experimental EXAFS fit of Ti foil by fixing CN as known crystallographic value.

S<sub>0</sub><sup>2</sup> is the amplitude reduction factor; CN, coordination number; R, distance between absorber and backscatter atoms; σ<sup>2</sup>, Debye-Waller factor to account for both thermal and structural disorders; ΔE<sub>0</sub>, inner potential correction; R factor indicates the goodness of the fitting.

**Table S2.** The slope of Mott-Schottky curves and corresponding  $N_d$  for all catalysts.

| Sample                                | Slope                 | N <sub>d</sub>         |
|---------------------------------------|-----------------------|------------------------|
| Tiv-TiO <sub>2</sub>                  | 3.584×10 <sup>9</sup> | 1.687×10 <sup>17</sup> |
| S-Tiv-TiO <sub>2</sub>                | 1.797×10 <sup>9</sup> | 3.365×10 <sup>17</sup> |
| H <sub>2</sub> S-Tiv-TiO <sub>2</sub> | 1.494×10 <sup>9</sup> | 4.047×10 <sup>17</sup> |
| CS <sub>2</sub> -Tiv-TiO <sub>2</sub> | 1.2×10 <sup>9</sup>   | 5.039×10 <sup>17</sup> |

**Table S3.** Amount of O<sub>2</sub> evolution for the samples during 6 hours and the corresponding rate of O<sub>2</sub> production.

| Sample                 | Amount of O <sub>2</sub> during 6h<br>(μmol·cm <sup>-2</sup> ) | Oxygen production rate<br>(μmol·cm <sup>-2</sup> ·h <sup>-1</sup> ) |
|------------------------|----------------------------------------------------------------|---------------------------------------------------------------------|
| Tiv-TiO <sub>2</sub>   | 10.75                                                          | 1.80                                                                |
| S-Tiv-TiO <sub>2</sub> | 26.45                                                          | 4.45                                                                |

---

|                                       |       |       |
|---------------------------------------|-------|-------|
| H <sub>2</sub> S-Tiv-TiO <sub>2</sub> | 48.41 | 8.11  |
| CS <sub>2</sub> -Tiv-TiO <sub>2</sub> | 73.17 | 12.19 |

---
